# Supplementary material
Source: PubMed Central journal article supplement (PMC3724348)

# Supporting Information

## PPAR $\delta$ agonist GW0742 interacts weakly with multiple nuclear receptors including the vitamin D receptor

*Premchendar Nandhikonda<sup>1#</sup>, Adam Yasgar<sup>4#</sup>, Athena M. Baranowski<sup>1</sup>, Preetpal S. Sidhu<sup>1</sup>, Megan M. McCallum<sup>1</sup>, Alan J. Pawlak<sup>1</sup>, Kelly Teske<sup>1</sup>, Belaynesh Feleke<sup>1</sup>, Nina Y. Yuan<sup>1</sup>, Chinedum Kevin<sup>1</sup>, Daniel D. Bikle<sup>2</sup>, Steven D. Ayers<sup>3</sup>, Paul Webb<sup>3</sup>, Ganesha Rai<sup>4</sup>, Anton Simeonov<sup>4</sup>, Ajit Jadhav<sup>4</sup>, David Maloney<sup>4</sup>, Leggy A. Arnold<sup>1\*</sup>.*

Figure S1. ITC binding isotherms. 250  $\mu$ M GW0742 were added in 2.02  $\mu$ L injection volumes (20 injections) to 30  $\mu$ M of SRC2 protein, in PBS at pH 7.2. All solutions were degassed for 15 minutes under vacuum and the ITC was carried out at 25°C, 200 rpm stir rate, and 300 sec between injection

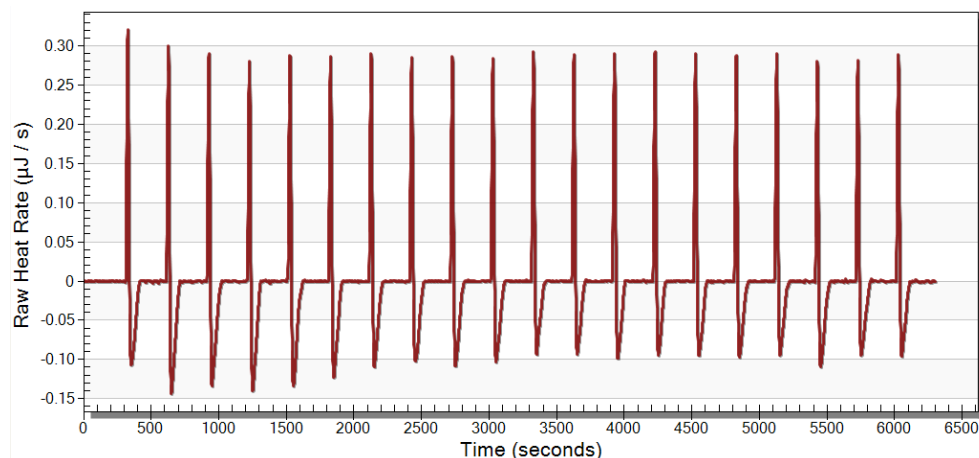

Supplement: NIHMS487974-supplement-1_si_001.pdf [file NIHMS487974-supplement-1_si_001.pdf]
